# Supplementary material for: Probing the role of encapsulated alkaline earth metal atoms in endohedral metallofullerenes M@C76 (M = Ca, Sr, and Ba) by first-principles calculations
Source: Royal Society of Chemistry journal article supplement (doi:10.1039/c2dt12420c), 2012-01-01
Supplement: c2dt12420c.pdf [file c2dt12420c.pdf]

*Electronic Supplementary Information for*

Probing the Role of Encapsulated Alkaline Earth Metal Atom in  
Endohedral Metallofullerenes  $M@C_{76}$  (M=Ca, Sr, and Ba) by  
First-Principles Calculations

Tao Yang, Xiang Zhao,\* Qian Xu, Hong Zheng, Wei-Wei Wang, and Sheng-Tao Li

*Institute for Chemical Physics and Department of Chemistry, State Key Laboratory of  
Electrical Insulation and Power Equipment, Xi'an Jiaotong University, Xi'an 710049,  
China*

*Telephone: +86 29 8266 5671. Fax: +86 29 8266 8559.*

*E-mail: [xzhao@mail.xjtu.edu.cn](mailto:xzhao@mail.xjtu.edu.cn)*

## Contents

**I.** Optimized relative energies and HOMO-LUMO gaps of all selected  $M@C_{76}$  (M=Ca, Sr, and Ba) isomers.

**II.** Zero point energy of  $M@C_1(17459)-C_{76}$  and  $M@C_{2v}(19138)-C_{76}$  (M=Ca, Sr, and Ba) at the B3LYP/3-21G-Lanl2dz level of theory.

**III.** Cartesian coordinates of molecular structures of  $M@C_1(17459)-C_{76}$  and  $M@C_{2v}(19138)-C_{76}$  (M=Ca, Sr, and Ba).

**IV.** The simulated IR spectra of  $C_{76}^{2-}-C_1(17459)$ ,  $C_{76}^{2-}-C_{2v}(19138)$ ,  $M@C_1(17459)-C_{76}$  and  $M@C_{2v}(19138)-C_{76}$  (M=Ca, Sr, and Ba).

## I. Optimized relative energies and HOMO-LUMO gaps of all selected $M@C_{76}$ (M=Ca, Sr, and Ba) isomers.

As the alkaline earth metal transfers two electrons to the carbon cages, the energy order of  $M@C_{76}$  may in accordance with that of di-anions. The energy order of di-anions  $C_{76}^{2-}$  can be obtained in the Supporting Information of ref.37. We chose several most stable di-anions  $C_{76}^{2-}$  as the candidates of  $M@C_{76}$ , including two IPR, all PA=1 isomers and two PA=2 isomers. The molecular structures of endohedral fullerene  $M@C_{76}$  were optimized at B3LYP/6-31G(d)-Lanl2dz level. The calculated results of IPR, PA=1 and main PA=2 isomers have been collected in Table S1.

**Table S1** Relative energies and HOMO-LUMO gaps of all selected  $M@C_{76}$  (M=Ca, Sr, and Ba) isomers.

| $C_{76}$<br>spiral<br>ID | PA | sym.     | $Ca@C_{76}$ |      | $Sr@C_{76}$ |      | $Ba@C_{76}$ |      |
|--------------------------|----|----------|-------------|------|-------------|------|-------------|------|
|                          |    |          | $\Delta E$  | gap  | $\Delta E$  | gap  | $\Delta E$  | gap  |
|                          |    |          | kcal/mol    | eV   | kcal/mol    | eV   | kcal/mol    | eV   |
| 17459                    | 1  | $C_1$    | 0.00        | 1.71 | 0.00        | 1.70 | 0.00        | 1.68 |
| 19138                    | 1  | $C_{2v}$ | 0.39        | 1.42 | 0.61        | 1.41 | 0.28        | 1.40 |
| 19151                    | 0  | $T_d$    | 6.53        | 0.93 | 5.49        | 0.91 | 4.02        | 0.88 |
| 17646                    | 1  | $C_2$    | 6.95        | 1.88 | 7.05        | 1.87 | 7.43        | 1.87 |
| 17894                    | 1  | $C_1$    | 7.25        | 1.38 | 8.16        | 1.36 | 9.17        | 1.33 |
| 17418                    | 1  | $C_1$    | 11.21       | 1.25 | 10.70       | 1.26 | 10.30       | 1.27 |
| 17410                    | 1  | $C_s$    | 12.84       | 1.73 | 12.26       | 1.76 | 11.81       | 1.79 |
| 17750                    | 1  | $C_1$    | 13.59       | 1.21 | 14.16       | 1.16 | 14.91       | 1.10 |
| 19150                    | 0  | $D_2$    | 13.87       | 0.99 | 12.88       | 0.94 | 11.45       | 0.95 |
| 18632                    | 1  | $C_1$    | 15.43       | 1.47 | 15.75       | 1.44 | 15.93       | 1.40 |
| 18542                    | 1  | $C_1$    | 16.23       | 1.12 | 16.77       | 1.08 | 17.51       | 1.03 |
| 19142                    | 1  | $C_s$    | 16.94       | 1.19 | 16.46       | 1.24 | 13.86       | 1.31 |
| 18944                    | 2  | $C_2$    | 20.0        | 1.42 | 19.67       | 1.45 | 18.45       | 1.51 |
| 18439                    | 1  | $C_1$    | 23.87       | 1.51 | 24.1        | 1.46 | 25.41       | 1.41 |
| 18943                    | 2  | $C_1$    | 24.13       | 1.45 | 24.2        | 1.50 | 23.39       | 1.58 |
| 18720                    | 1  | $C_1$    | 32.00       | 1.13 | 32.5        | 1.09 | 33.31       | 1.06 |

## II. Zero point energy of $M@C_1(17459)-C_{76}$ and $M@C_{2v}(19138)-C_{76}$ (M=Ca, Sr, and Ba) calculated at B3LYP/3-21G-Lan12dz level of theory.

To further show the different performance of  $M@C_1(17459)-C_{76}$  and  $M@C_{2v}(19138)-C_{76}$  (M=Ca, Sr, and Ba) at 0K, the zero point energy of  $M@C_1(17459)-C_{76}$  and  $M@C_{2v}(19138)-C_{76}$  (M=Ca, Sr, and Ba) calculated at the B3LYP/3-21G-Lan12dz level of theory has been collected in Table S2.

**Table S2** Zero point energy of  $M@C_1(17459)-C_{76}$  and  $M@C_{2v}(19138)-C_{76}$  (M=Ca, Sr, and Ba) at B3LYP/3-21G-Lan12dz level of theory.

| $C_{76}$            | Energy                 | zero point energy(ZPE) | ZPE corrected energy   |
|---------------------|------------------------|------------------------|------------------------|
|                     | $\Delta E$<br>kcal/mol | $E$<br>kcal/mol        | $\Delta E$<br>kcal/mol |
| Ca@ $C_1(17459)$    | 0.00                   | 292.37                 | 0.00                   |
| Ca@ $C_{2v}(19138)$ | 2.08                   | 291.98                 | 1.69                   |
| Sr@ $C_1(17459)$    | 0.00                   | 292.25                 | 0.00                   |
| Sr@ $C_{2v}(19138)$ | 2.54                   | 291.90                 | 2.19                   |
| Ba@ $C_1(17459)$    | 0.00                   | 292.28                 | 0.00                   |
| Ba@ $C_{2v}(19138)$ | 2.39                   | 291.89                 | 1.99                   |

It's notably that these energies are obtained at the B3LYP/3-21G-Lan12dz level of theory. On the other hand, the relative energies provided in the paper are calculated at the B3LYP/6-31G(d)-Lan12dz level of theory, which are always viewed much more precise. Thus, the relative energies have a few differences. In Table S2, it's obvious that even though the encapsulated metal changes, the zero point energy for  $M@C_1(17459)$  is little smaller than that for  $M@C_{2v}(19138)$ , which reduces the energy difference between  $M@C_1(17459)$  and  $M@C_{2v}(19138)$ .

## III. Cartesian coordinates of molecular structures of $M@C_1(17459)-C_{76}$ and $M@C_{2v}(19138)-C_{76}$ (M=Ca, Sr, and Ba).

### A. Ca@ $C_1(17459)-C_{76}$ .

Coordinates:

|   |           |           |          |
|---|-----------|-----------|----------|
| C | -0.016096 | -0.064872 | 0.110891 |
| C | 1.370518  | -0.056216 | 0.110248 |
| C | 2.106736  | 1.186620  | 0.105207 |

|   |           |           |           |
|---|-----------|-----------|-----------|
| C | 3.296231  | 0.977445  | -0.673159 |
| C | 3.935222  | 2.044493  | -1.353006 |
| C | 4.583941  | 1.739500  | -2.589549 |
| C | 4.725726  | 2.727580  | -3.625652 |
| C | 4.654679  | 2.047859  | -4.892933 |
| C | 4.165573  | 2.696816  | -6.077990 |
| C | 3.410188  | 1.866669  | -6.980410 |
| C | 2.211194  | 2.390559  | -7.620238 |
| C | 1.201050  | 1.353525  | -7.611471 |
| C | -0.153210 | 1.597862  | -7.237102 |
| C | -0.921626 | 0.496809  | -6.638850 |
| C | -2.025831 | 0.791500  | -5.718684 |
| C | -2.402041 | -0.161155 | -4.725155 |
| C | -2.797432 | 0.239078  | -3.402999 |
| C | -2.350130 | -0.783816 | -2.467016 |
| C | -1.895686 | -0.421370 | -1.206780 |
| C | -0.734600 | -1.068450 | -0.637273 |
| C | -0.727130 | 1.201658  | 0.000725  |
| C | -1.878917 | 0.983572  | -0.818746 |
| C | -2.366752 | 1.994131  | -1.692959 |
| C | -2.837794 | 1.604103  | -3.031015 |
| C | -2.707970 | 2.541571  | -4.095501 |
| C | -2.302091 | 2.147115  | -5.405085 |
| C | -1.553813 | 3.233911  | -6.006074 |
| C | -0.510692 | 2.995837  | -6.935580 |
| C | 0.477532  | 4.030546  | -7.058172 |
| C | 1.845559  | 3.731946  | -7.458164 |
| C | 2.730162  | 4.618861  | -6.758769 |
| C | 3.813160  | 4.096386  | -5.972540 |
| C | 3.725675  | 4.724099  | -4.656172 |
| C | 4.166144  | 4.040748  | -3.472768 |
| C | 3.489981  | 4.338197  | -2.250224 |
| C | 3.387435  | 3.350585  | -1.187307 |
| C | 2.154368  | 3.535944  | -0.491965 |
| C | 1.439086  | 2.440924  | 0.082965  |
| C | -0.029534 | 2.444669  | 0.000324  |
| C | -0.673757 | 3.513430  | -0.687408 |
| C | -1.806145 | 3.290151  | -1.519020 |
| C | -1.725317 | 4.238942  | -2.624554 |
| C | -2.182045 | 3.867382  | -3.873156 |
| C | -1.466608 | 4.297438  | -5.044991 |
| C | -0.320510 | 5.145084  | -4.956895 |
| C | 0.556782  | 5.115377  | -6.084345 |
| C | 1.936187  | 5.480952  | -5.938408 |

|    |           |           |           |
|----|-----------|-----------|-----------|
| C  | 2.514699  | 5.534826  | -4.634658 |
| C  | 1.677843  | 5.577101  | -3.464577 |
| C  | 2.271903  | 5.096874  | -2.253878 |
| C  | 1.466568  | 4.615643  | -1.157582 |
| C  | 0.088895  | 4.612038  | -1.272282 |
| C  | -0.541229 | 5.047129  | -2.486388 |
| C  | 0.221543  | 5.462382  | -3.621011 |
| C  | 2.096540  | -1.014397 | -0.704011 |
| C  | 3.249756  | -0.358127 | -1.242773 |
| C  | 3.665143  | -0.587353 | -2.580745 |
| C  | 4.412271  | 0.458060  | -3.203450 |
| C  | 4.416314  | 0.649335  | -4.622315 |
| C  | 3.609868  | -0.152066 | -5.477047 |
| C  | 3.167853  | 0.468500  | -6.684360 |
| C  | 1.862606  | 0.147599  | -7.193307 |
| C  | 1.136445  | -0.889738 | -6.656374 |
| C  | -0.281160 | -0.763760 | -6.486534 |
| C  | -0.657227 | -1.702606 | -5.451003 |
| C  | -1.720123 | -1.432742 | -4.610380 |
| C  | -1.668799 | -1.816206 | -3.213159 |
| C  | -0.513515 | -2.406855 | -2.692083 |
| C  | -0.032071 | -2.026083 | -1.387191 |
| C  | 1.412708  | -1.961712 | -1.453874 |
| C  | 1.829498  | -2.224922 | -2.820104 |
| C  | 2.895724  | -1.506097 | -3.429112 |
| C  | 2.833786  | -1.257571 | -4.879461 |
| C  | 1.678162  | -1.689838 | -5.576534 |
| C  | 0.559261  | -2.285535 | -4.904479 |
| C  | 0.642193  | -2.587971 | -3.555894 |
| Ca | 1.707673  | 2.848063  | -4.781794 |

### B. Ca@C<sub>2v</sub>(19138)-C<sub>76</sub>.

Coordinates:

|   |           |           |           |
|---|-----------|-----------|-----------|
| C | 0.898327  | -0.709801 | -3.696581 |
| C | -0.501340 | -1.141764 | -3.695893 |
| C | 1.909657  | -1.464181 | -3.033301 |
| C | 1.520783  | -2.691970 | -2.319280 |
| C | 0.144456  | -3.092962 | -2.355797 |
| C | -0.849698 | -2.310931 | -3.052305 |
| C | -1.901629 | -3.250193 | -1.225061 |
| C | -2.105431 | -2.382390 | -2.342788 |

|   |           |           |           |
|---|-----------|-----------|-----------|
| C | -0.503224 | -3.661430 | -1.224918 |
| C | -0.499178 | 1.141970  | -3.695480 |
| C | -1.368326 | 0.000920  | -3.667352 |
| C | 0.899666  | 0.707356  | -3.696321 |
| C | -3.014164 | -1.267677 | -2.299143 |
| C | -2.596086 | 0.001946  | -2.919016 |
| C | -3.912613 | -1.237230 | -1.176958 |
| C | -3.646981 | -2.057907 | -0.000342 |
| C | -2.602096 | -3.033415 | -0.000459 |
| C | -4.454072 | 0.003050  | 0.717622  |
| C | -4.454075 | 0.003306  | -0.717669 |
| C | -3.912601 | -1.237599 | 1.176494  |
| C | -3.011774 | 1.272144  | -2.298702 |
| C | -3.910258 | 1.242980  | -1.176516 |
| C | 0.150305  | 3.091475  | -2.354690 |
| C | -0.845325 | 2.311560  | -3.051469 |
| C | 1.525864  | 2.687849  | -2.318312 |
| C | 1.912413  | 1.459585  | -3.032770 |
| C | -2.100914 | 2.385134  | -2.341923 |
| C | -1.895490 | 3.252181  | -1.223907 |
| C | -0.496304 | 3.660763  | -1.223610 |
| C | -3.643070 | 2.062724  | 0.000392  |
| C | -2.596350 | 3.036271  | 0.000624  |
| C | 3.030541  | 0.712492  | -2.568927 |
| C | 3.029191  | -0.719356 | -2.569185 |
| C | 3.811094  | 1.154080  | -1.418796 |
| C | 3.402945  | 2.284470  | -0.723227 |
| C | 2.266715  | 3.060066  | -1.171240 |
| C | 3.808905  | -1.162817 | -1.419205 |
| C | 4.280947  | -0.004939 | -0.704698 |
| C | -3.910241 | 1.242507  | 1.176936  |
| C | -3.011864 | 1.271273  | 2.299184  |
| C | -2.596252 | 0.000905  | 2.919103  |
| C | -3.014258 | -1.268447 | 2.298721  |
| C | -1.901750 | -3.250653 | 1.224117  |
| C | -2.105620 | -2.383217 | 2.342116  |
| C | -0.845593 | 2.310469  | 3.052591  |
| C | -2.101107 | 2.384297  | 2.342958  |
| C | -0.499500 | 1.140657  | 3.696225  |
| C | -1.368636 | -0.000385 | 3.667628  |
| C | -1.895610 | 3.251766  | 1.225281  |
| C | -0.849966 | -2.312011 | 3.051775  |
| C | 0.144251  | -3.093783 | 2.355059  |
| C | -0.503335 | -3.661866 | 1.223932  |

|    |           |           |           |
|----|-----------|-----------|-----------|
| C  | 0.203572  | -3.859565 | -0.000495 |
| C  | -0.501663 | -1.143083 | 3.695823  |
| C  | 0.898004  | -0.711119 | 3.696760  |
| C  | 1.909391  | -1.465259 | 3.033304  |
| C  | 1.520576  | -2.692790 | 2.318806  |
| C  | 0.899343  | 0.706039  | 3.697007  |
| C  | -0.496416 | 3.660328  | 1.225238  |
| C  | 0.150100  | 3.090622  | 2.356161  |
| C  | 1.912148  | 1.458501  | 3.033820  |
| C  | 1.525661  | 2.687023  | 2.319765  |
| C  | 3.398551  | -2.292936 | 0.723882  |
| C  | 2.260836  | -3.066412 | 1.171803  |
| C  | 3.398615  | -2.292675 | -0.724043 |
| C  | 2.260935  | -3.065986 | -1.172339 |
| C  | 1.598780  | -3.586739 | -0.000387 |
| C  | 3.808778  | -1.163323 | 1.419483  |
| C  | 3.028970  | -0.720270 | 2.569559  |
| C  | 3.030318  | 0.711575  | 2.569810  |
| C  | 3.810964  | 1.153572  | 1.419898  |
| C  | 4.280880  | -0.005191 | 0.705426  |
| C  | 3.402882  | 2.284214  | 0.724700  |
| C  | 2.266620  | 3.059659  | 1.172893  |
| C  | 1.605542  | 3.581647  | 0.000894  |
| C  | 0.210860  | 3.857136  | 0.000883  |
| Ca | -1.743678 | 0.000468  | -0.001114 |

### C. Sr@C<sub>1</sub>(17459)-C<sub>76</sub>.

Coordinates:

|   |           |           |           |
|---|-----------|-----------|-----------|
| C | -0.015203 | -0.062627 | 0.109004  |
| C | 1.371765  | -0.053403 | 0.107785  |
| C | 2.107433  | 1.189516  | 0.102637  |
| C | 3.296980  | 0.980540  | -0.677020 |
| C | 3.934596  | 2.047954  | -1.358005 |
| C | 4.583633  | 1.744796  | -2.595425 |
| C | 4.733495  | 2.732473  | -3.631393 |
| C | 4.665490  | 2.050497  | -4.898686 |
| C | 4.167293  | 2.698328  | -6.081240 |
| C | 3.411836  | 1.869837  | -6.983582 |
| C | 2.211953  | 2.391661  | -7.622271 |
| C | 1.201804  | 1.355899  | -7.615896 |
| C | -0.152965 | 1.601075  | -7.243309 |



|   |           |           |           |
|---|-----------|-----------|-----------|
| C | -0.920254 | 0.499781  | -6.642558 |
| C | -2.024079 | 0.793976  | -5.720552 |
| C | -2.400796 | -0.158867 | -4.727148 |
| C | -2.797272 | 0.241081  | -3.404591 |
| C | -2.349006 | -0.781680 | -2.468994 |
| C | -1.895002 | -0.419647 | -1.208294 |
| C | -0.733632 | -1.066402 | -0.639079 |
| C | -0.726378 | 1.203742  | -0.001030 |
| C | -1.878522 | 0.985455  | -0.820391 |
| C | -2.366121 | 1.996077  | -1.694819 |
| C | -2.837039 | 1.605927  | -3.032751 |
| C | -2.707811 | 2.544132  | -4.097206 |
| C | -2.299624 | 2.150105  | -5.406702 |
| C | -1.552789 | 3.237650  | -6.008829 |
| C | -0.510363 | 2.999733  | -6.941010 |
| C | 0.476611  | 4.031162  | -7.059366 |
| C | 1.843716  | 3.728889  | -7.452412 |
| C | 2.726064  | 4.611605  | -6.751923 |
| C | 3.807772  | 4.092826  | -5.969195 |
| C | 3.727200  | 4.727088  | -4.657198 |
| C | 4.172239  | 4.047215  | -3.477473 |
| C | 3.490967  | 4.341918  | -2.255042 |
| C | 3.387498  | 3.354595  | -1.192163 |
| C | 2.154643  | 3.539910  | -0.494733 |
| C | 1.439528  | 2.443906  | 0.079968  |
| C | -0.028943 | 2.447222  | -0.002105 |
| C | -0.673524 | 3.516282  | -0.689633 |
| C | -1.806003 | 3.292658  | -1.521093 |
| C | -1.724789 | 4.241868  | -2.627125 |
| C | -2.181592 | 3.869673  | -3.875483 |
| C | -1.466011 | 4.300808  | -5.048061 |
| C | -0.321233 | 5.151350  | -4.959506 |
| C | 0.557048  | 5.114066  | -6.083730 |
| C | 1.934561  | 5.475661  | -5.935150 |
| C | 2.514617  | 5.535526  | -4.635132 |
| C | 1.677929  | 5.585533  | -3.467070 |
| C | 2.272427  | 5.101722  | -2.257401 |
| C | 1.467199  | 4.619335  | -1.160821 |
| C | 0.088973  | 4.615325  | -1.275464 |
| C | -0.540620 | 5.050786  | -2.489568 |
| C | 0.221604  | 5.470644  | -3.624612 |
| C | 2.097804  | -1.011532 | -0.706783 |
| C | 3.251081  | -0.355219 | -1.245671 |
| C | 3.665045  | -0.583460 | -2.584726 |

|    |           |           |           |
|----|-----------|-----------|-----------|
| C  | 4.410828  | 0.462370  | -3.208470 |
| C  | 4.421502  | 0.652722  | -4.627984 |
| C  | 3.612780  | -0.149624 | -5.482102 |
| C  | 3.169641  | 0.471045  | -6.688598 |
| C  | 1.863334  | 0.149479  | -7.196972 |
| C  | 1.137318  | -0.887851 | -6.660156 |
| C  | -0.280761 | -0.761674 | -6.490087 |
| C  | -0.656481 | -1.700161 | -5.453662 |
| C  | -1.719481 | -1.430877 | -4.612733 |
| C  | -1.667763 | -1.814103 | -3.215339 |
| C  | -0.512500 | -2.404989 | -2.694142 |
| C  | -0.030959 | -2.024161 | -1.389240 |
| C  | 1.413784  | -1.958924 | -1.456523 |
| C  | 1.830326  | -2.222646 | -2.823000 |
| C  | 2.896304  | -1.503129 | -3.432589 |
| C  | 2.835006  | -1.254300 | -4.883050 |
| C  | 1.678875  | -1.687626 | -5.579762 |
| C  | 0.560066  | -2.283098 | -4.907133 |
| C  | 0.643154  | -2.586077 | -3.558465 |
| Sr | 1.644326  | 2.656620  | -4.584048 |

#### D. Sr@C<sub>2v</sub>(19138)-C<sub>76</sub>.

Coordinates:

|   |           |           |           |
|---|-----------|-----------|-----------|
| C | 0.894816  | -0.709879 | -3.697573 |
| C | -0.505914 | -1.141394 | -3.697160 |
| C | 1.906258  | -1.464045 | -3.033719 |
| C | 1.517196  | -2.691588 | -2.319735 |
| C | 0.140754  | -3.092665 | -2.357364 |
| C | -0.853989 | -2.311042 | -3.053649 |
| C | -1.907011 | -3.248914 | -1.225853 |
| C | -2.110945 | -2.382120 | -2.344884 |
| C | -0.508140 | -3.658455 | -1.224859 |
| C | -0.503754 | 1.141610  | -3.696750 |
| C | -1.373833 | 0.000926  | -3.668808 |
| C | 0.896155  | 0.707439  | -3.697313 |
| C | -3.020908 | -1.267833 | -2.304184 |
| C | -2.605844 | 0.001959  | -2.924553 |
| C | -3.908832 | -1.236104 | -1.175944 |
| C | -3.649556 | -2.058705 | -0.000426 |
| C | -2.608329 | -3.033427 | -0.000564 |
| C | -4.444549 | 0.003040  | 0.716020  |

|   |           |           |           |
|---|-----------|-----------|-----------|
| C | -4.444410 | 0.003296  | -0.716188 |
| C | -3.909092 | -1.236587 | 1.175434  |
| C | -3.018533 | 1.272318  | -2.303747 |
| C | -3.906508 | 1.241853  | -1.175509 |
| C | 0.146596  | 3.091182  | -2.356257 |
| C | -0.849621 | 2.311682  | -3.052818 |
| C | 1.522272  | 2.687471  | -2.318769 |
| C | 1.909012  | 1.459450  | -3.033190 |
| C | -2.106439 | 2.384875  | -2.344024 |
| C | -1.900883 | 3.250906  | -1.224698 |
| C | -0.501233 | 3.657787  | -1.223550 |
| C | -3.645673 | 2.063536  | 0.000309  |
| C | -2.602602 | 3.036299  | 0.000519  |
| C | 3.027690  | 0.712663  | -2.569362 |
| C | 3.026344  | -0.719527 | -2.569622 |
| C | 3.808325  | 1.154100  | -1.419052 |
| C | 3.399749  | 2.284593  | -0.723368 |
| C | 2.263893  | 3.060360  | -1.171869 |
| C | 3.806139  | -1.162839 | -1.419462 |
| C | 4.278286  | -0.004940 | -0.704998 |
| C | -3.906763 | 1.241497  | 1.175883  |
| C | -3.018938 | 1.271566  | 2.304317  |
| C | -2.606279 | 0.000916  | 2.924729  |
| C | -3.021319 | -1.268725 | 2.303851  |
| C | -1.907119 | -3.249305 | 1.224745  |
| C | -2.111204 | -2.382957 | 2.344093  |
| C | -0.849908 | 2.310597  | 3.053801  |
| C | -2.106700 | 2.384048  | 2.344939  |
| C | -0.504091 | 1.140290  | 3.697347  |
| C | -1.374180 | -0.000380 | 3.668907  |
| C | -1.900990 | 3.250424  | 1.225908  |
| C | -0.854276 | -2.312129 | 3.052979  |
| C | 0.140529  | -3.093514 | 2.356531  |
| C | -0.508252 | -3.658869 | 1.223746  |
| C | 0.199396  | -3.856160 | -0.000561 |
| C | -0.506251 | -1.142707 | 3.696941  |
| C | 0.894482  | -0.711197 | 3.697669  |
| C | 1.905988  | -1.465134 | 3.033634  |
| C | 1.516988  | -2.692416 | 2.319175  |
| C | 0.895820  | 0.706121  | 3.697916  |
| C | -0.501346 | 3.657333  | 1.225050  |
| C | 0.146373  | 3.090356  | 2.357635  |
| C | 1.908742  | 1.458377  | 3.034152  |
| C | 1.522068  | 2.686651  | 2.320136  |

|    |           |           |           |
|----|-----------|-----------|-----------|
| C  | 3.395359  | -2.293056 | 0.723941  |
| C  | 2.258001  | -3.066686 | 1.172339  |
| C  | 3.395424  | -2.292802 | -0.724185 |
| C  | 2.258118  | -3.066285 | -1.172969 |
| C  | 1.595054  | -3.585606 | -0.000444 |
| C  | 3.806025  | -1.163348 | 1.419668  |
| C  | 3.026113  | -0.720447 | 2.569904  |
| C  | 3.027458  | 0.711752  | 2.570152  |
| C  | 3.808209  | 1.153595  | 1.420082  |
| C  | 4.278235  | -0.005192 | 0.705663  |
| C  | 3.399685  | 2.284331  | 0.724758  |
| C  | 2.263780  | 3.059930  | 1.173430  |
| C  | 1.601807  | 3.580509  | 0.000837  |
| C  | 0.206672  | 3.853734  | 0.000816  |
| Sr | -1.477699 | 0.000319  | 0.002475  |

### **E. Ba@C<sub>1</sub>(17459)-C<sub>76</sub>.**

Coordinates:

|   |           |           |           |
|---|-----------|-----------|-----------|
| C | -0.013811 | -0.059430 | 0.106072  |
| C | 1.373823  | -0.049497 | 0.103970  |
| C | 2.108965  | 1.193227  | 0.098339  |
| C | 3.298661  | 0.984575  | -0.682888 |
| C | 3.936726  | 2.052171  | -1.364434 |
| C | 4.588131  | 1.749310  | -2.601410 |
| C | 4.740804  | 2.736306  | -3.637149 |
| C | 4.671811  | 2.052038  | -4.903089 |
| C | 4.161731  | 2.698325  | -6.080585 |
| C | 3.410008  | 1.871890  | -6.983484 |
| C | 2.212143  | 2.393456  | -7.623658 |
| C | 1.202759  | 1.359105  | -7.620610 |
| C | -0.152284 | 1.604921  | -7.252022 |
| C | -0.918362 | 0.503288  | -6.648907 |
| C | -2.021014 | 0.797595  | -5.724263 |
| C | -2.398226 | -0.155379 | -4.730445 |
| C | -2.796784 | 0.243988  | -3.407441 |
| C | -2.347289 | -0.778405 | -2.472209 |
| C | -1.894093 | -0.417062 | -1.210619 |
| C | -0.732245 | -1.063393 | -0.641753 |
| C | -0.725156 | 1.206833  | -0.003742 |
| C | -1.877928 | 0.988344  | -0.822973 |
| C | -2.365357 | 1.999193  | -1.697687 |

|   |           |           |           |
|---|-----------|-----------|-----------|
| C | -2.836172 | 1.608861  | -3.035926 |
| C | -2.706152 | 2.547890  | -4.100254 |
| C | -2.295375 | 2.154596  | -5.410001 |
| C | -1.550906 | 3.242962  | -6.013597 |
| C | -0.508477 | 3.004172  | -6.947496 |
| C | 0.477944  | 4.031408  | -7.060112 |
| C | 1.843640  | 3.727450  | -7.448898 |
| C | 2.724362  | 4.609133  | -6.750582 |
| C | 3.798522  | 4.088045  | -5.966625 |
| C | 3.722930  | 4.725294  | -4.658575 |
| C | 4.175514  | 4.051848  | -3.483209 |
| C | 3.493817  | 4.348496  | -2.259756 |
| C | 3.389091  | 3.359996  | -1.199089 |
| C | 2.155341  | 3.544449  | -0.500350 |
| C | 1.440757  | 2.447927  | 0.075074  |
| C | -0.027842 | 2.450915  | -0.005515 |
| C | -0.671934 | 3.520222  | -0.694230 |
| C | -1.805116 | 3.296559  | -1.524850 |
| C | -1.724061 | 4.247056  | -2.630819 |
| C | -2.179559 | 3.873143  | -3.879263 |
| C | -1.463798 | 4.305175  | -5.052758 |
| C | -0.320634 | 5.158329  | -4.962729 |
| C | 0.559412  | 5.113275  | -6.083521 |
| C | 1.933828  | 5.474151  | -5.935124 |
| C | 2.512470  | 5.535423  | -4.637409 |
| C | 1.678009  | 5.594787  | -3.470311 |
| C | 2.274708  | 5.109839  | -2.261293 |
| C | 1.468835  | 4.624915  | -1.165739 |
| C | 0.089633  | 4.620897  | -1.279801 |
| C | -0.540109 | 5.057236  | -2.493420 |
| C | 0.221690  | 5.481285  | -3.628723 |
| C | 2.100018  | -1.007683 | -0.710946 |
| C | 3.253762  | -0.351740 | -1.249727 |
| C | 3.668675  | -0.580071 | -2.589771 |
| C | 4.415293  | 0.464571  | -3.214310 |
| C | 4.430471  | 0.653720  | -4.634801 |
| C | 3.620311  | -0.149483 | -5.489514 |
| C | 3.172173  | 0.472731  | -6.693188 |
| C | 1.864799  | 0.151562  | -7.201698 |
| C | 1.139066  | -0.885557 | -6.665846 |
| C | -0.279737 | -0.758937 | -6.495522 |
| C | -0.654788 | -1.696530 | -5.457811 |
| C | -1.718119 | -1.428027 | -4.616502 |
| C | -1.665848 | -1.810870 | -3.218835 |

|    |           |           |           |
|----|-----------|-----------|-----------|
| C  | -0.510643 | -2.402081 | -2.697308 |
| C  | -0.029147 | -2.021427 | -1.392346 |
| C  | 1.415521  | -1.955468 | -1.460220 |
| C  | 1.832097  | -2.219621 | -2.827178 |
| C  | 2.898682  | -1.500112 | -3.437528 |
| C  | 2.839189  | -1.251784 | -4.888868 |
| C  | 1.680783  | -1.684395 | -5.584283 |
| C  | 0.562014  | -2.279260 | -4.910987 |
| C  | 0.645136  | -2.583362 | -3.562172 |
| Ba | 1.527445  | 2.414659  | -4.298835 |

### F. Ba@C<sub>2v</sub>(19138)-C<sub>76</sub>.

Coordinates:

|   |           |           |           |
|---|-----------|-----------|-----------|
| C | 0.888726  | -0.710007 | -3.697291 |
| C | -0.512644 | -1.141484 | -3.699007 |
| C | 1.900975  | -1.463920 | -3.033798 |
| C | 1.511498  | -2.691904 | -2.319809 |
| C | 0.135058  | -3.092459 | -2.358605 |
| C | -0.860263 | -2.311115 | -3.054574 |
| C | -1.914600 | -3.249664 | -1.226909 |
| C | -2.118097 | -2.382700 | -2.346003 |
| C | -0.515573 | -3.656603 | -1.224822 |
| C | -0.510488 | 1.141691  | -3.698593 |
| C | -1.380946 | 0.000926  | -3.671168 |
| C | 0.890061  | 0.707558  | -3.697027 |
| C | -3.025959 | -1.266953 | -2.306037 |
| C | -2.614059 | 0.001961  | -2.928415 |
| C | -3.904535 | -1.232239 | -1.173485 |
| C | -3.649674 | -2.056842 | -0.000268 |
| C | -2.615689 | -3.033909 | -0.000342 |
| C | -4.441677 | 0.003041  | 0.715540  |
| C | -4.441667 | 0.003295  | -0.715436 |
| C | -3.904470 | -1.232583 | 1.173115  |
| C | -3.023600 | 1.271441  | -2.305618 |
| C | -3.902225 | 1.237977  | -1.173055 |
| C | 0.140885  | 3.090965  | -2.357495 |
| C | -0.855904 | 2.311753  | -3.053744 |
| C | 1.516562  | 2.687777  | -2.318837 |
| C | 1.903722  | 1.459318  | -3.033265 |
| C | -2.113600 | 2.385461  | -2.345150 |
| C | -1.908497 | 3.251683  | -1.225761 |

|   |           |           |           |
|---|-----------|-----------|-----------|
| C | -0.508691 | 3.655942  | -1.223515 |
| C | -3.645834 | 2.061689  | 0.000465  |
| C | -2.610003 | 3.036820  | 0.000739  |
| C | 3.023024  | 0.712756  | -2.569359 |
| C | 3.021681  | -0.719627 | -2.569622 |
| C | 3.803943  | 1.154241  | -1.419168 |
| C | 3.394551  | 2.285068  | -0.723516 |
| C | 2.259487  | 3.061469  | -1.172277 |
| C | 3.801765  | -1.162986 | -1.419581 |
| C | 4.273859  | -0.004942 | -0.705187 |
| C | -3.902161 | 1.237487  | 1.173565  |
| C | -3.023468 | 1.270513  | 2.306001  |
| C | -2.613954 | 0.000916  | 2.928293  |
| C | -3.025835 | -1.267671 | 2.305522  |
| C | -1.914705 | -3.250210 | 1.226126  |
| C | -2.118178 | -2.383494 | 2.345404  |
| C | -0.856118 | 2.310656  | 3.054975  |
| C | -2.113684 | 2.384590  | 2.346256  |
| C | -0.510752 | 1.140375  | 3.699408  |
| C | -1.381165 | -0.000382 | 3.671437  |
| C | -1.908601 | 3.251356  | 1.227293  |
| C | -0.860476 | -2.312194 | 3.054156  |
| C | 0.134891  | -3.093308 | 2.357991  |
| C | -0.515659 | -3.657106 | 1.223988  |
| C | 0.193110  | -3.854464 | -0.000424 |
| C | -0.512907 | -1.142805 | 3.699007  |
| C | 0.888455  | -0.711327 | 3.697582  |
| C | 1.900740  | -1.465000 | 3.033915  |
| C | 1.511310  | -2.692739 | 2.319448  |
| C | 0.889789  | 0.706239  | 3.697821  |
| C | -0.508779 | 3.655576  | 1.225291  |
| C | 0.140718  | 3.090136  | 2.359088  |
| C | 1.903487  | 1.458233  | 3.034429  |
| C | 1.516375  | 2.686960  | 2.320401  |
| C | 3.390177  | -2.293547 | 0.724259  |
| C | 2.253643  | -3.067850 | 1.172946  |
| C | 3.390236  | -2.293280 | -0.724334 |
| C | 2.253723  | -3.067402 | -1.173379 |
| C | 1.589442  | -3.584905 | -0.000327 |
| C | 3.801628  | -1.163488 | 1.419926  |
| C | 3.021482  | -0.720535 | 2.570092  |
| C | 3.022822  | 0.711831  | 2.570338  |
| C | 3.803802  | 1.153728  | 1.420338  |
| C | 4.273782  | -0.005194 | 0.705974  |

|    |           |          |           |
|----|-----------|----------|-----------|
| C  | 3.394493  | 2.284818 | 0.725076  |
| C  | 2.259410  | 3.061083 | 1.174035  |
| C  | 1.596182  | 3.579805 | 0.000954  |
| C  | 0.200363  | 3.852029 | 0.000951  |
| Ba | -1.098820 | 0.000382 | -0.004493 |

**IV.** The simulated IR spectra of  $C_{76}^{2-}-C_1(17459)$ ,  $C_{76}^{2-}-C_{2v}(19138)$ ,  $M@C_1(17459)-C_{76}$  and  $M@C_{2v}(19138)-C_{76}$  ( $M=Ca, Sr,$  and  $Ba$ ).

IR spectra of six endohedral metallofullerenes have been calculated theoretically to assist further experimental characterization. In addition, the IR spectra of two di-anions,  $C_{76}^{2-}-C_1(17459)$  and  $C_{76}^{2-}-C_{2v}(19138)$ , have also simulated to compare with endohedral metallofullerenes.

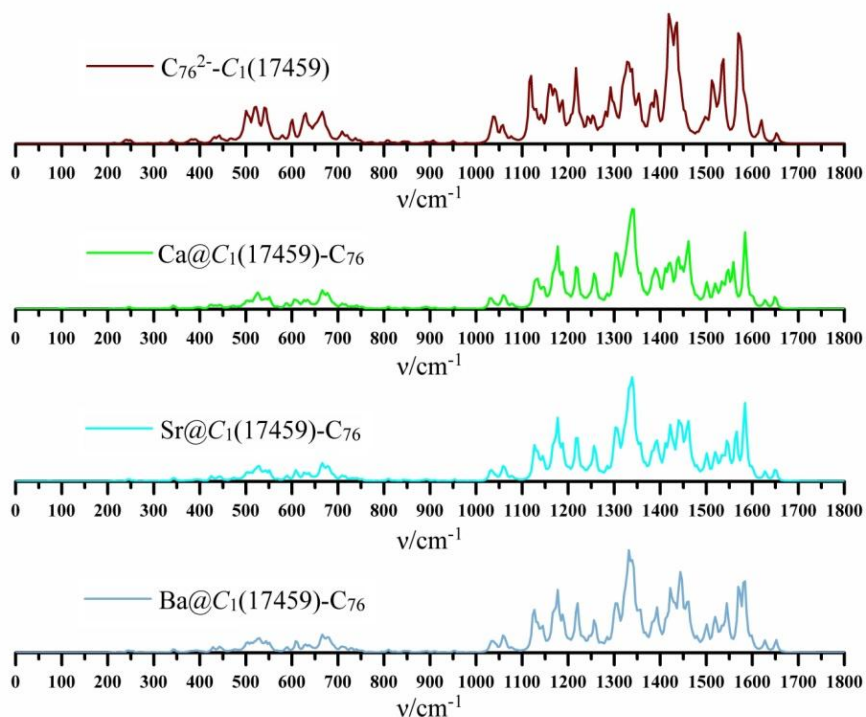

**Fig. S1** Simulated IR spectra of  $C_{76}^{2-}-C_1(17459)$  and  $M@C_1(17459)-C_{76}$  ( $M=Ca, Sr,$  and  $Ba$ ).



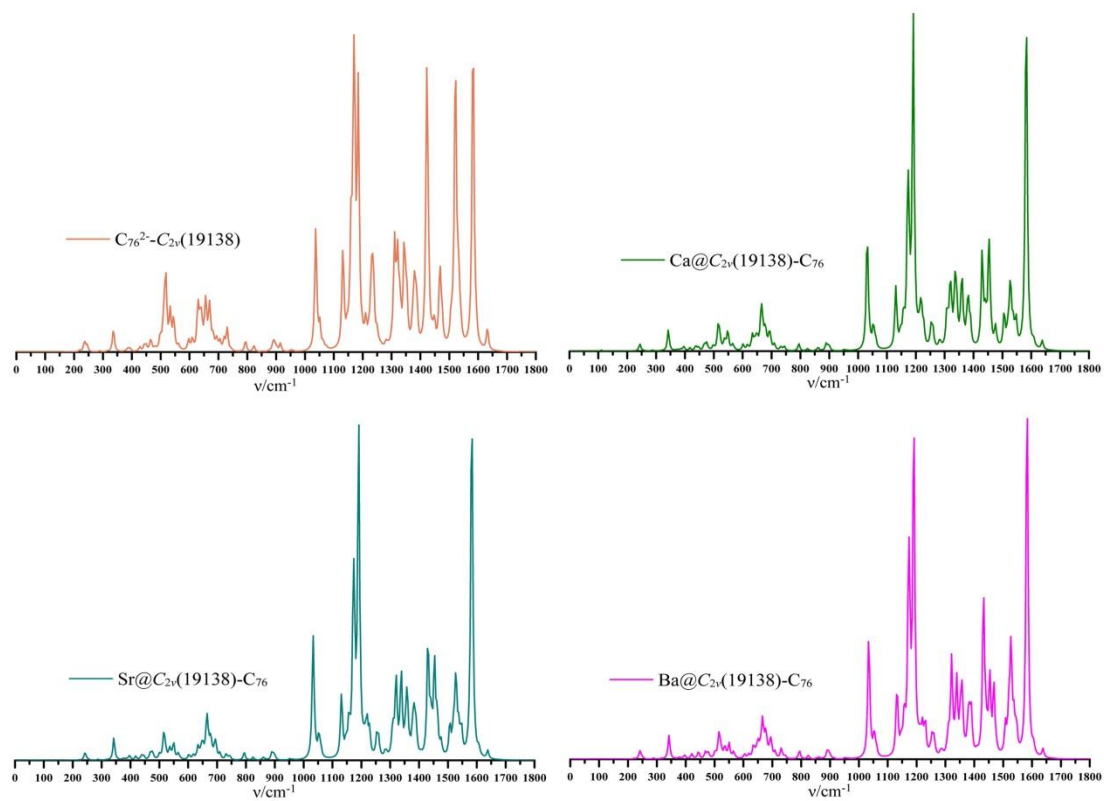

**Fig. S2** Simulated IR spectra of  $C_{76}^{2-}-C_{2v}(19138)$  and  $M@C_{2v}(19138)-C_{76}$  ( $M=Ca, Sr, \text{ and } Ba$ )
